# Supplementary material for: Measuring the Effectiveness of COVID-19 Vaccines Used during a Surge of the Delta Variant of SARS-CoV-2 in Bangladesh: A Test-Negative Design Evaluation
Source: MDPI journal article supplement (doi:10.3390/vaccines10122069), 2022-12-02
Supplement: s1 [file s1]

**Supplementary Table S2: Protection against severe COVID-19 disease at presentation by receipt of complete regimens of vaccines**

\*

|                                                    | Severe cases     |                      | Severe controls  |                      | Protective effectiveness (PE) % (95% confidence interval, CI) |                |                              |                |
|----------------------------------------------------|------------------|----------------------|------------------|----------------------|---------------------------------------------------------------|----------------|------------------------------|----------------|
|                                                    | <i>Vaccinees</i> | <i>Non-vaccinees</i> | <i>Vaccinees</i> | <i>Non-vaccinees</i> | <i>Crude PE</i>                                               | <i>p-value</i> | <i>Adjusted PE</i>           | <i>p-value</i> |
| <b>Any vaccine<sup>‡</sup></b>                     | 3                | 24                   | 10               | 35                   | 56(-76,89)                                                    | 0.244          | 80 (-3, 98) <sup>‡</sup>     | 0.079          |
| <b>Serum Institute of India (ChAdOx1 nCoV- 19)</b> | 2                | 24                   | 1                | 35                   | -192(-3300,75)                                                | 0.393          | -41 (-4220, 96) <sup>‡</sup> | 0.827          |
| <b>Sinopharm (Vero Cell-inactivated)</b>           | 1                | 24                   | 6                | 35                   | 76(-115,97)                                                   | 0.203          | 87 (-8, 99) <sup>‡</sup>     | 0.098          |
| <b>Moderna (mRNA-1273)</b>                         | 0                | 24                   | 3                | 35                   | 100(-Inf,100)                                                 | 0.991          | 100(-Inf,100) <sup>‡</sup>   | 0.996          |

\*Received 2<sup>nd</sup> dose of vaccine at least 14 days before presentation

<sup>†</sup>Adjusted by: forced variables (age in years, study month of presentation, and study site and other covariates which were significantly associated at p<0.05 in the stepwise model

<sup>‡</sup>Body mass index any, Serum Institute of India, Moderna

<sup>‡</sup>Any vaccine (Serum Institute of India (ChAdOx1 nCoV-19), Sinopharm (Vero Cell- inactivated), Moderna (mRNA-1273))
