# Supplementary material for: Measuring the Effectiveness of COVID-19 Vaccines Used during a Surge of the Delta Variant of SARS-CoV-2 in Bangladesh: A Test-Negative Design Evaluation
Source: MDPI journal article supplement (doi:10.3390/vaccines10122069), 2022-12-02
Supplement: s1 [file s1]

**Supplementary Table S1. Comparability of cases and controls with severe disease at presentation**

| Name of variables               | Parameters        | Severe Cases (n=27)   | Severe Controls (n=45) | p-value |
|---------------------------------|-------------------|-----------------------|------------------------|---------|
| Month-wise enrolled participant | September         | 9(33.3%)              | 8(17.8%)               | 0.051   |
|                                 | October           | 11(40.7%)             | 28(62.2%)              |         |
|                                 | November          | 7(25.9%)              | 5(11.1%)               |         |
|                                 | December          | 0(0%)                 | 4(8.9%)                |         |
| Age in years (mean $\pm$ SD)    |                   | 54.9 $\pm$ 18.8       | 57.3 $\pm$ 14.2        | 0.304   |
| Age groups                      | 18-30 years       | 2(7.4%)               | 2(4.4%)                | 0.491   |
|                                 | 31-60 years       | 15(55.6%)             | 20(44.4%)              |         |
|                                 | 61+ years         | 10(37%)               | 23(51.1%)              |         |
| Sex                             | Female            | 18(66.7%)             | 11(24.4%)              | 0.001   |
|                                 | Male              | 9(33.3%)              | 34(75.6%)              |         |
| Religion                        | Non-Muslim        | 0(0%)                 | 1(2.2%)                | 1.000   |
|                                 | Muslim            | 27(100%)              | 44(97.8%)              |         |
| Body mass index (BMI)           | KG/M <sup>2</sup> | 25.2 $\pm$ 4.8        | 21.7 $\pm$ 3.3         | 0.002   |
| HH members <sup>*</sup>         | Count             | 4.9 $\pm$ 2.1         | 5.7 $\pm$ 2.4          | 0.126   |
| HH income                       | BD Taka           | 27592.6 $\pm$ 16380.7 | 26000 $\pm$ 18544.8    | 0.705   |
| Smokers <sup>†</sup>            | No                | 25(92.6%)             | 25(55.6%)              | 0.002   |
|                                 | Yes               | 2(7.4%)               | 20(44.4%)              |         |
| Heart disease <sup>‡</sup>      | No                | 25(92.6%)             | 38(84.4%)              | 0.520   |
|                                 | Yes               | 2(7.4%)               | 7(15.6%)               |         |
| Hypertension <sup>‡</sup>       | No                | 20(74.1%)             | 30(66.7%)              | 0.692   |
|                                 | Yes               | 7(25.9%)              | 15(33.3%)              |         |
| Lung disease <sup>‡</sup>       | No                | 27(100%)              | 44(97.8%)              | 1.000   |
|                                 | Yes               | 0(0%)                 | 1(2.2%)                |         |
| Diabetes mellitus <sup>‡</sup>  | No                | 22(81.5%)             | 39(86.7%)              | 0.800   |
|                                 | Yes               | 5(18.5%)              | 6(13.3%)               |         |
| Stomach disease <sup>‡</sup>    | No                | 27(100%)              | 45(100%)               | -       |
| Kidney disease <sup>‡</sup>     | No                | 26(96.3%)             | 45(100%)               | 0.795   |
|                                 | Yes               | 1(3.7%)               | 0(0%)                  |         |
| Liver disease <sup>‡</sup>      | No                | 27(100%)              | 45(100%)               | -       |

|                                                  |       |           |           |       |
|--------------------------------------------------|-------|-----------|-----------|-------|
| Anaemia <sup>‡</sup>                             | No    | 27(100%)  | 45(100%)  | -     |
| Cancer <sup>‡</sup>                              | No    | 26(96.3%) | 43(95.6%) | 1.000 |
|                                                  | Yes   | 1(3.7%)   | 2(4.4%)   |       |
| Depression <sup>‡</sup>                          | No    | 26(96.3%) | 45(100%)  | 0.795 |
|                                                  | Yes   | 1(3.7%)   | 0(0%)     |       |
| Osteoarthritis <sup>‡</sup>                      | No    | 27(100%)  | 45(100%)  | -     |
| Modified Charlson Comorbidity Index <sup>§</sup> | Score | 1.9 ± 2.4 | 1.8 ± 2.1 | 0.891 |

\*HH means household

<sup>†</sup>A person who smokes tobacco regularly

<sup>‡</sup>Ascertained by history

<sup>§</sup>Modified Charlson Comorbidity Index<sup>13</sup>
